# Supplementary material
Source: MDPI journal article supplement (https://www.mdpi.com/2075-5309/11/9/381)
Supplement: s1 [file s1]

**Table S1.** Variation of adsorption by curing age for reference and TiO<sub>2</sub> coated specimens.

| Curing Age [days] | Adsorption [%] |      |                         |      |
|-------------------|----------------|------|-------------------------|------|
|                   | Reference      |      | TiO <sub>2</sub> Coated |      |
|                   | Average        | SD   | Average                 | SD   |
| 2                 | 12.92          | 0.49 | 19.72                   | 4.09 |
| 5                 | 9.13           | 0.72 | 12.31                   | 2.30 |
| 14                | 8.83           | 2.88 | 7.07                    | 2.13 |
| 28                | 3.55           | 1.77 | 5.79                    | 3.33 |
| 90                | 3.08           | 1.57 | 5.25                    | 2.56 |

**Table S2.** The influence of TiO<sub>2</sub> coating time gap on the photocatalytic efficiency

| Irradiation time [h] | Photocatalytic efficiency [%] |      |         |      |         |      |         |      |         |      |         |      |
|----------------------|-------------------------------|------|---------|------|---------|------|---------|------|---------|------|---------|------|
|                      | SP_1.5 h                      |      | SP_5 h  |      | SP_9 h  |      | SP_24 h |      | SP_32 h |      | SP_7 d  |      |
|                      | Average                       | SD   | Average | SD   | Average | SD   | Average | SD   | Average | SD   | Average | SD   |
| 1                    | 3.23                          | 1.76 | 2.42    | 2.40 | 1.19    | 0.67 | 1.84    | 0.36 | 2.12    | 0.57 | 4.82    | 0.90 |
| 2                    | 6.69                          | 2.09 | 4.44    | 2.30 | 4.36    | 1.03 | 4.78    | 2.18 | 5.95    | 1.20 | 8.91    | 1.57 |
| 4                    | 14.34                         | 1.38 | 13.72   | 1.72 | 10.44   | 1.09 | 12.14   | 1.23 | 12.45   | 1.88 | 21.74   | 1.14 |
| 8                    | 21.12                         | 1.92 | 20.74   | 1.95 | 19.25   | 0.73 | 19.33   | 1.18 | 22.07   | 2.39 | 28.90   | 1.63 |

**Table S3.** The influence of TiO<sub>2</sub> coating rates on the photocatalytic efficiency.

| Irradiation time [h] | Photocatalytic efficiency [%] |      |         |      |         |      |         |      |         |      |
|----------------------|-------------------------------|------|---------|------|---------|------|---------|------|---------|------|
|                      | R                             |      | CR10    |      | CR20    |      | CR40    |      | CR80    |      |
|                      | Average                       | SD   | Average | SD   | Average | SD   | Average | SD   | Average | SD   |
| 1                    | 1.96                          | 1.34 | 3.20    | 1.48 | 2.46    | 2.52 | 2.73    | 0.81 | 3.48    | 0.41 |
| 2                    | 6.28                          | 1.44 | 5.99    | 2.89 | 5.66    | 2.17 | 6.56    | 1.20 | 5.96    | 0.32 |
| 4                    | 13.17                         | 1.41 | 13.21   | 3.13 | 14.02   | 1.80 | 13.13   | 1.85 | 13.22   | 0.68 |
| 8                    | 16.78                         | 2.91 | 16.70   | 5.93 | 17.62   | 4.65 | 19.70   | 4.18 | 21.03   | 0.59 |
